# Supplementary material
Source: Springer Nature journal article supplement (https://www.springermedizin.de/resource/supplementary/12911_2009_302_MOESM3_ESM.pdf/9525454)
Supplement: MOESM3 [file 9525454]

<ZONE id=1 Type="EVENT\_Report" Location\_id="Yei&Equatorial&Sudan" Anchor\_Val="2006-11-21" Val="Past\_REF" STime="2006-9-1" STime\_Dir="AS\_OF" ETime="2006-11-8" ETime\_Dir="AS\_OF">

From 1 September to 8 November 2006, 16 deaths of meningococcal disease have been reported in Greater <NAME cl="LOCATION">Yei</NAME> County, Central <NAME cl="LOCATION">Equatorial</NAME> State of South <NAME cl="LOCATION">Sudan</NAME>.

</ZONE>

<ZONE id=2 Type="EVENT\_Normal" Location\_id="Yei" Anchor\_Val="2006-11-21" Val="Past\_REF" STime="2006-W44" STime\_Dir="AS\_OF" ETime="2006-W44" ETime\_Dir="AS\_OF">

The epidemic threshold was crossed in this county during the last week of October.

</ZONE>
